# Supplementary material
Source: publisher site journal article supplement (https://www.dovepress.com/article/483014)
Supplement: Supplementary file 1 [file get_supplementary_file.php]

**Supplementary files**

**Supplementary Table S1** Baseline patient characteristics between laparoscopic anatomical liver resection (LAR) and laparoscopic non-anatomical liver resection (LNAR) subgroups for patients with tumor size less than or equal to 5 cm. HBV, Hepatitis B virus; HCV, Hepatitis C virus; ASA, American Society of Anesthesiologists; TBIL, Total bilirubin; ALT, Alanine transaminase; PT, Prothrombin time; Plt, Platelet; AFP, Alpha-fetoprotein. ICG-R15, Indocyanine green retention test at 15 minutes. (*, P < 0.05, statistical significance)

| **Characteristics** | **Before PSM** | | | **After PSM** | | |
| --- | --- | --- | --- | --- | --- | --- |
| **LAR**  **（N=225）** | **LNAR（N=303）** | **P** | **LAR**  **（N=207）** | **LNAR**  **（N=207）** | **P** |
| Age | 53.04±10.98 | 51.27±11.27 | 0.073 | 52.44±10.86 | 52.33±11.36 | 0.919 |
| Gender |  |  | 0.118 |  |  | 0.681 |
| Male | 185 (82.2%) | 264 (87.1%) |  | 174 (84.1%) | 177 (85.5%) |  |
| Female | 40 (17.8%) | 39 (12.9%) |  | 33 (15.9%) | 30 (14.5%) |  |
| HBV | 197 (87.6%) | 265 (87.5%) | 0.973 | 183 (88.4%) | 179 (86.5%) | 0.553 |
| HCV | 5 (2.2%) | 2 (0.7%) | 0.121 | 0 (0%) | 2 (1.0%) | 0.156 |
| Liver cirrhosis | 150 (66.7%) | 209 (69.0%) | 0.574 | 140 (69.6%) | 134 (64.7%) | 0.533 |
| Child-Pugh score |  |  | 1.000 |  |  | 1.000 |
| A | 225 (100%) | 303 (100%) |  | 207 (100%) | 207 (100%) |  |
| B | 0 (0%) | 0 (0%) |  | 0(0%) | 0 (0%) |  |
| ASA score |  |  | 0.669 |  |  | 0.766 |
| Ⅰ | 126 (56.0%) | 164 (54.1%) |  | 118 (57.0%) | 115 (55.6%) |  |
| Ⅱ | 99 (44.0%) | 139 (45.9%) |  | 89 (43.0%) | 92 (44.4%) |  |
| TBIL(µmol/L) | 15.73±6.23 | 16.27±6.25 | 0.332 | 15.78±6.32 | 15.87±6.15 | 0.881 |
| ALT (IU/L) | 38.34±24.56 | 43.68±35.43 | 0.042* | 38.57±25.05 | 39.69±29.24 | 0.675 |
| ALB | 42.48±4.01 | 42.69±4.06 | 0.549 | 42.69±3.90 | 42.73±4.13 | 0.935 |
| PT (INR) | 1.01±0.06 | 1.02±0.08 | 0.032* | 1.01±0.07 | 1.01±0.07 | 0.523 |
| Plt (*103 /μL) | 143.25±59.12 | 123.45±51.57 | <0.001* | 138.36±53.62 | 132.72±49.53 | 0.267 |
| ICG-R15 (%) | 4.89±3.06 | 5.38±3.12 | 0.073 | 4.95±3.02 | 4.81±2.76 | 0.627 |
| AFP (≥400 ng/ mL ) | 57 (25.3%) | 81 (26.7%) | 0.717 | 53 (25.6%) | 55 (26.6%) | 0.823 |
| Tumor number |  |  | 0.147 |  |  | 0.463 |
| 1 | 216 (96.0%) | 279 (92.1%) |  | 199 (96.1%) | 197 (95.2%) |  |
| 2-3 | 8 (3.6%) | 23 (7.6%) |  | 7 (3.4%) | 10 (4.8%) |  |
| ≥4 | 1 (0.4%) | 1 (0.3%) |  | 1 (0.5%) | 0 (0%) |  |
| Range of LR |  |  | 0.189 |  |  | 0.745 |
| Minor | 197 (87.6%) | 276 (91.1%) |  | 185 (89.4%) | 187 (90.3%) |  |
| Major | 28 (12.4%) | 27 (8.9%) |  | 22 (10.6%) | 20 (9.7%) |  |
| Tumor Location |  |  | 0.007* |  |  | 0.665 |
| Central segments (1, 4a, 7, 8) | 59 (26.2%) | 113 (37.3%) |  | 58 (28.0%) | 62 (30.0%) |  |
| Peripheral segments (2, 3, 4b, 5, 6) | 166 (73.8%) | 190 (62.7%) |  | 149 (72.0%) | 145 (70.0%) |  |
| Resection tumor margin |  |  | 0.873 |  |  | 0.475 |
| ≥1cm | 217 (96.4%) | 293 (96.7%) |  | 202 (97.6%) | 204 (98.6%) |  |
| ＜1cm | 8 (3.6%) | 10 (3.3%) |  | 5 (2.4%) | 3 (1.4%) |  |
| Margin status |  |  | 0.388 |  |  | 1.000 |
| Negative | 225 (100%) | 302 (99.7%) |  | 207 (100%) | 207 (100%) |  |
| Positive | 0 (0%) | 1 (0.3%) |  | 0 (0%) | 0 (0%) |  |
| Histological grade |  |  | 0.687 |  |  | 0.769 |
| Low | 30 (13.3%) | 36 (11.9%) |  | 29 (14.0%) | 25 (12.1%) |  |
| Moderate | 176 (78.2%) | 246 (81.2%) |  | 160 (77.3%) | 166 (80.2%) |  |
| High | 19 (8.4%) | 21 (6.9%) |  | 18 (8.7%) | 16 (7.7%) |  |
| Satellite nodule |  |  | 0.222 |  |  | 1.000 |
| Positive | 0 (0%) | 2 (0.7%) |  | 0 (0%) | 0(0%) |  |
| Negative | 225 (100%) | 301 (99.3%) |  | 207 (100%) | 207 (100%) |  |
| TNM stage |  |  | 0.134 |  |  | 1.000 |
| I-II | 225 (100%) | 300 (99.0%) |  | 207 (100%) | 207 (100%) |  |
| III-IV | 0 (0%) | 3 (1.0%) |  | 0 (0%) | 0 (0%) |  |

**Supplementary Table S2** Baseline patient characteristics between laparoscopic anatomical liver resection (LAR) and laparoscopic non-anatomical liver resection (LNAR) subgroups for patients with tumor size larger than 5 cm. HBV, Hepatitis B virus; HCV, Hepatitis C virus; ASA, American Society of Anesthesiologists; TBIL, Total bilirubin; ALT, Alanine transaminase; PT, Prothrombin time; Plt, Platelet; AFP, Alpha-fetoprotein. ICG-R15, Indocyanine green retention test at 15 minutes. (*, P < 0.05, statistical significance)

| **Characteristics** | **Before PSM** | | | **After PSM** | | |
| --- | --- | --- | --- | --- | --- | --- |
| **LAR**  **（N=79）** | **LNAR**  **（N=54）** | **P** | **LAR**  **（N=43）** | **LNAR**  **（N=43）** | **P** |
| Age | 51.75±11.64 | 50.04±11.96 | 0.412 | 50.98±10.80 | 49.95±11.25 | 0.668 |
| Gender |  |  | 0.314 |  |  | 1.000 |
| Male | 67 (84.8%) | 49 (90.7%) |  | 39 (90.7%) | 39 (90.7%) |  |
| Female | 12 (15.2%) | 5 (9.3%) |  | 4 (9.3%) | 4 (9.3%) |  |
| HBV | 62 (78.5%) | 44 (81.5%) | 0.673 | 36 (83.7%) | 36 (83.7%) | 1.000 |
| HCV | 1 (1.3%) | 0 (0%) | 0.407 | 0 (0%) | 0 (0%) | 1.000 |
| Liver cirrhosis | 46 (58.2%) | 29 (53.7%) | 0.605 | 24 (55.8%) | 26 (60.5%) | 0.662 |
| Child-Pugh score |  |  | 1.000 |  |  | 1.000 |
| A | 79 (100%) | 54 (100%) |  | 43 (100%) | 43 (100%) |  |
| B | 0 (0%) | 0 (0%) |  | 0(0%) | 0 (0%) |  |
| ASA score |  |  | 0.720 |  |  | 1.000 |
| Ⅰ | 42 (53.2%) | 27 (50%) |  | 23 (53.5%) | 23 (53.5%) |  |
| Ⅱ | 37 (46.8%) | 27 (50%) |  | 20 (46.5%) | 20 (46.5%) |  |
| TBIL(µmol/L) | 15.59±5.41 | 15.55±5.44 | 0.967 | 15.87±5.40 | 14.89±5.34 | 0.401 |
| ALT (IU/L) | 37.83±22.04 | 42.62±24.03 | 0.237 | 40.67±26.03 | 41.41±24.34 | 0.893 |
| ALB | 41.21±4.08 | 42.59±3.42 | 0.044* | 42.35±3.87 | 42.08±3.42 | 0.733 |
| PT (INR) | 1.02±0.07 | 1.01±0.06 | 0.474 | 1.00±0.07 | 1.01±0.06 | 0.477 |
| Plt (*103 /μL) | 170.28±90.51 | 167.48±67.68 | 0.847 | 158.86±72.28 | 173.19±71.82 | 0.359 |
| ICG-R15 (%) | 4.08±2.50 | 4.47±2.62 | 0.380 | 4.26±2.86 | 4.23±2.47 | 0.971 |
| AFP (≥400 ng/ mL ) | 21 (26.6%) | 18 (33.3%) | 0.401 | 13 (30.2%) | 15 (34.9%) | 0.645 |
| Tumor number |  |  | 0.029* |  |  | 0.645 |
| 1 | 76 (96.2%) | 45 (83.3%) |  | 41 (95.3%) | 40 (93.0%) |  |
| 2-3 | 2 (2.5%) | 8 (14.8%) |  | 2 (4.7%) | 3 (7.0%) |  |
| ≥4 | 1 (1.3%) | 1 (1.9%) |  | 0 (0%) | 0 (0%) |  |
| Range of LR |  |  | 0.550 |  |  | 1.000 |
| Minor | 48 (60.8%) | 30 (55.6%) |  | 24 (55.8%) | 24 (55.8%) |  |
| Major | 31 (39.2%) | 24 (44.4%) |  | 19 (44.2%) | 19 (44.2%) |  |
| Tumor Location |  |  | 0.280 |  |  | 0.787 |
| Central segments (1, 4a, 7, 8) | 21 (26.6%) | 10 (18.5%) |  | 9 (20.9%) | 8 (18.6%) |  |
| Peripheral segments (2, 3, 4b, 5, 6) | 58 (73.4%) | 44 (81.5%) |  | 34 (79.1%) | 35 (81.4%) |  |
| Resection tumor margin |  |  | 0.145 |  |  | 1.000 |
| ≥1cm | 73 (92.4%) | 53 (98.1%) |  | 43 (100%) | 43 (100%) |  |
| ＜1cm | 6 (7.6%) | 1 (1.9%) |  | 0 (0%) | 0 (0%) |  |
| Margin status |  |  | 1.000 |  |  | 1.000 |
| Negative | 79 (100%) | 54 (100%) |  | 43 (100%) | 43 (100%) |  |
| Positive | 0 (0%) | 0 (0%) |  | 0 (0%) | 0 (0%) |  |
| Histological grade |  |  | 0.298 |  |  | 0.499 |
| Low | 11 (13.9%) | 3 (5.6%) |  | 5 (11.6%) | 3 (7.0%) |  |
| Moderate | 62 (78.5%) | 46 (85.2%) |  | 34 (79.1%) | 38 (88.4%) |  |
| High | 6 (7.6%) | 5 (9.3%) |  | 4 (9.3%) | 2 (4.7%) |  |
| Satellite nodule |  |  | 0.085 |  |  | 1.000 |
| Positive | 0 (0%) | 2 (3.7%) |  | 0 (0%) | 0(0%) |  |
| Negative | 79 (100%) | 52 (96.3%) |  | 43 (100%) | 43 (100%) |  |
| TNM stage |  |  | 0.011* |  |  | 0.645 |
| I-II | 76 (96.2%) | 45 (83.3%) |  | 41 (95.3%) | 40 (93.0%) |  |
| III-IV | 3 (3.8%) | 9 (16.7%) |  | 2 (4.7%) | 3 (7.0%) |  |
